# Supplementary material
Source: PubMed Central journal article supplement (PMC4071099)
Supplement: supp_mcu081_mcu081supp.pdf [file supp_mcu081_mcu081supp.pdf]

SUPPLEMENTARY DATA

Fig. S1: Analyses of the ETS-dataset (ML and BI). Non-*Salvia* genera are highlighted (bold); only support values  $\geq 75\%$  (BS) and  $\geq 0.95$  (PP) are illustrated.

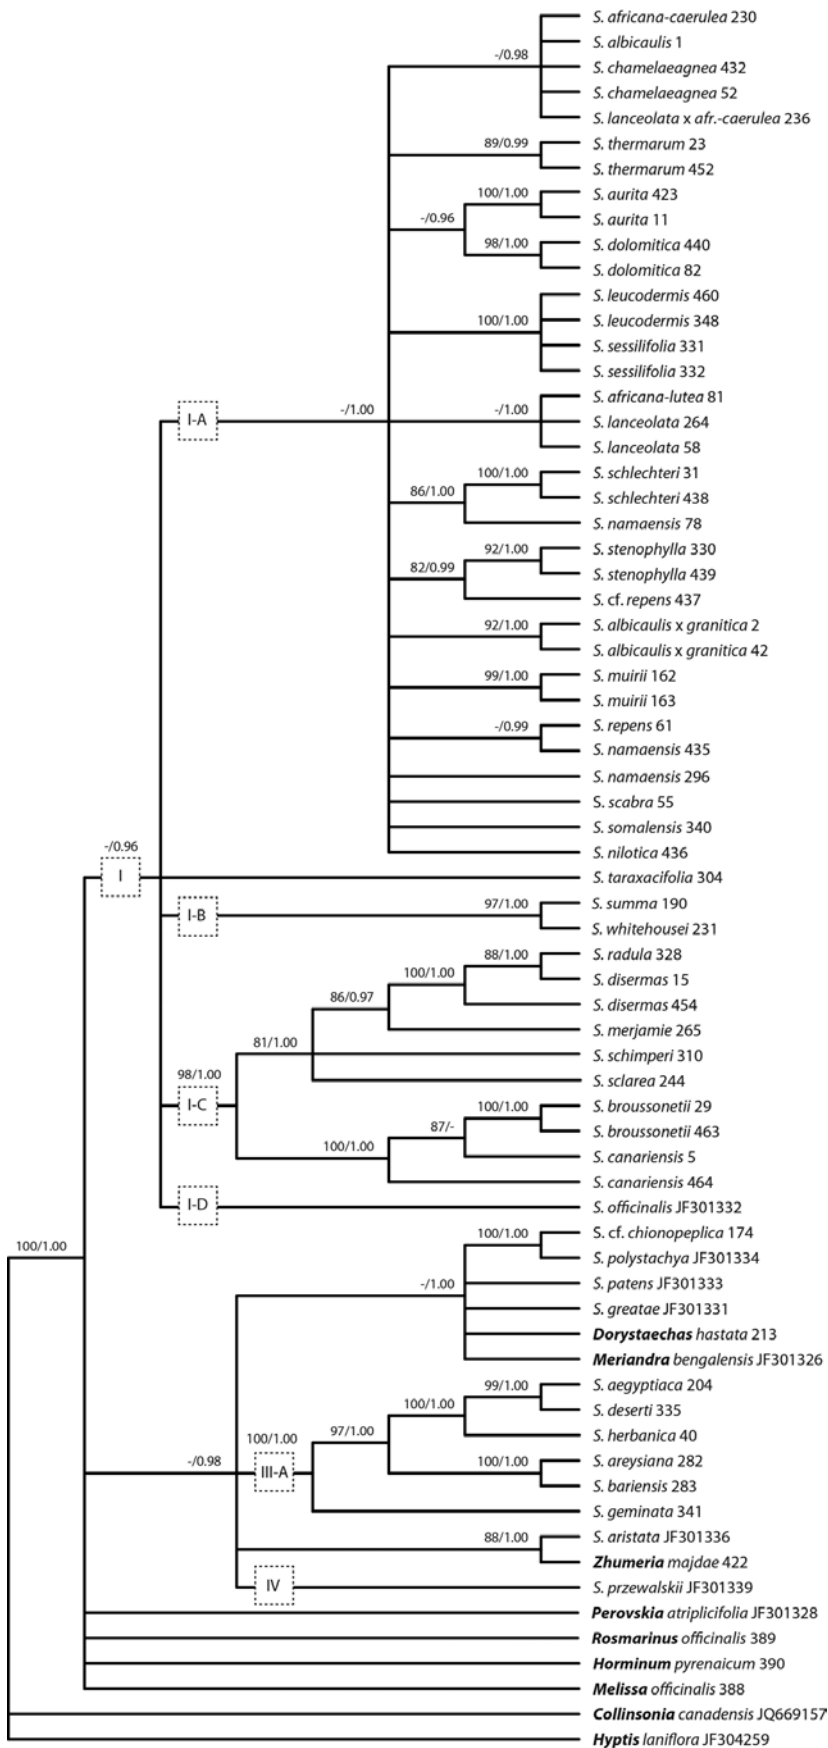

Fig. S2: Reconstruction of the ancestral distribution of Sub-Saharan African *Salvia*. Based on the combined dataset using the 50% majority-rule consensus-tree and 100 randomly sampled trees derived from BI; analysed under the MP criteria using Mesquite.

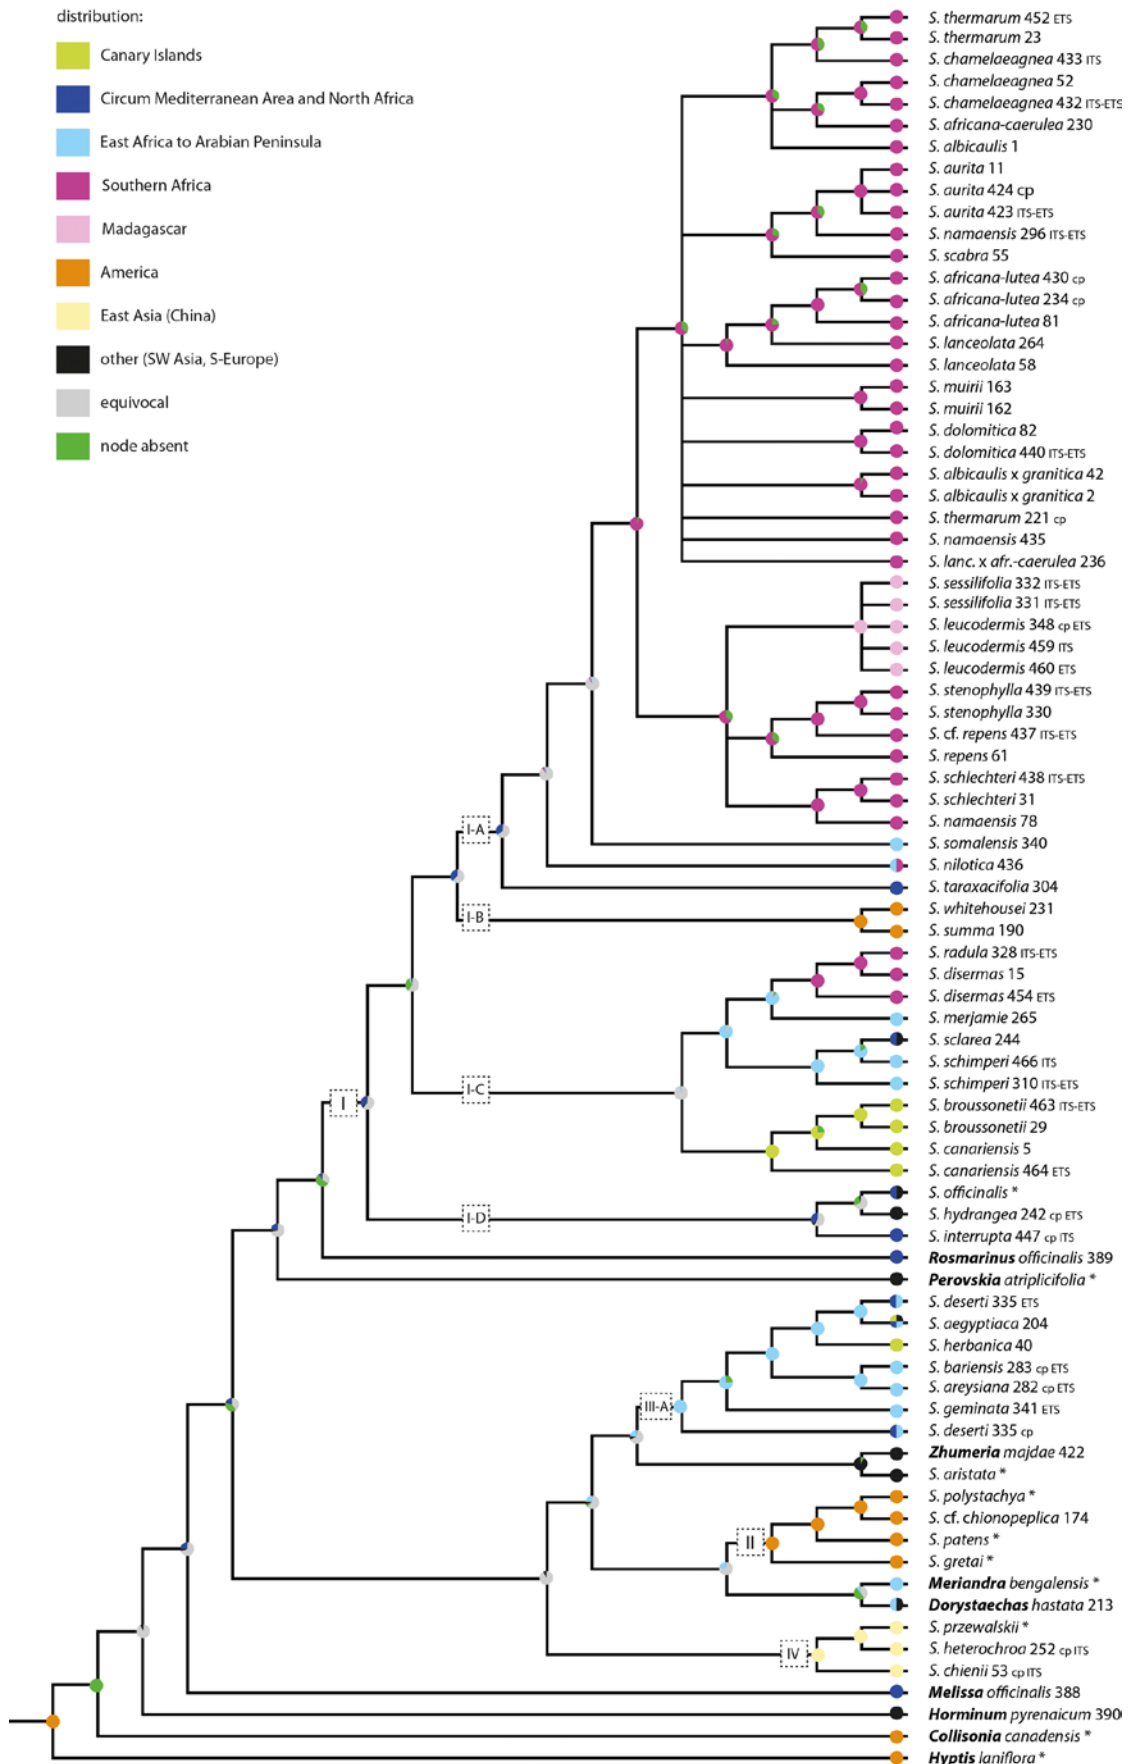

Fig. S3: Ancestral character state reconstruction of the life form in Sub-Saharan African *Salvia*. Based on the combined dataset; using the 50% majority-rule consensus-tree and 100 randomly sampled trees derived from BI; analysed under the MP criteria using Mesquite.

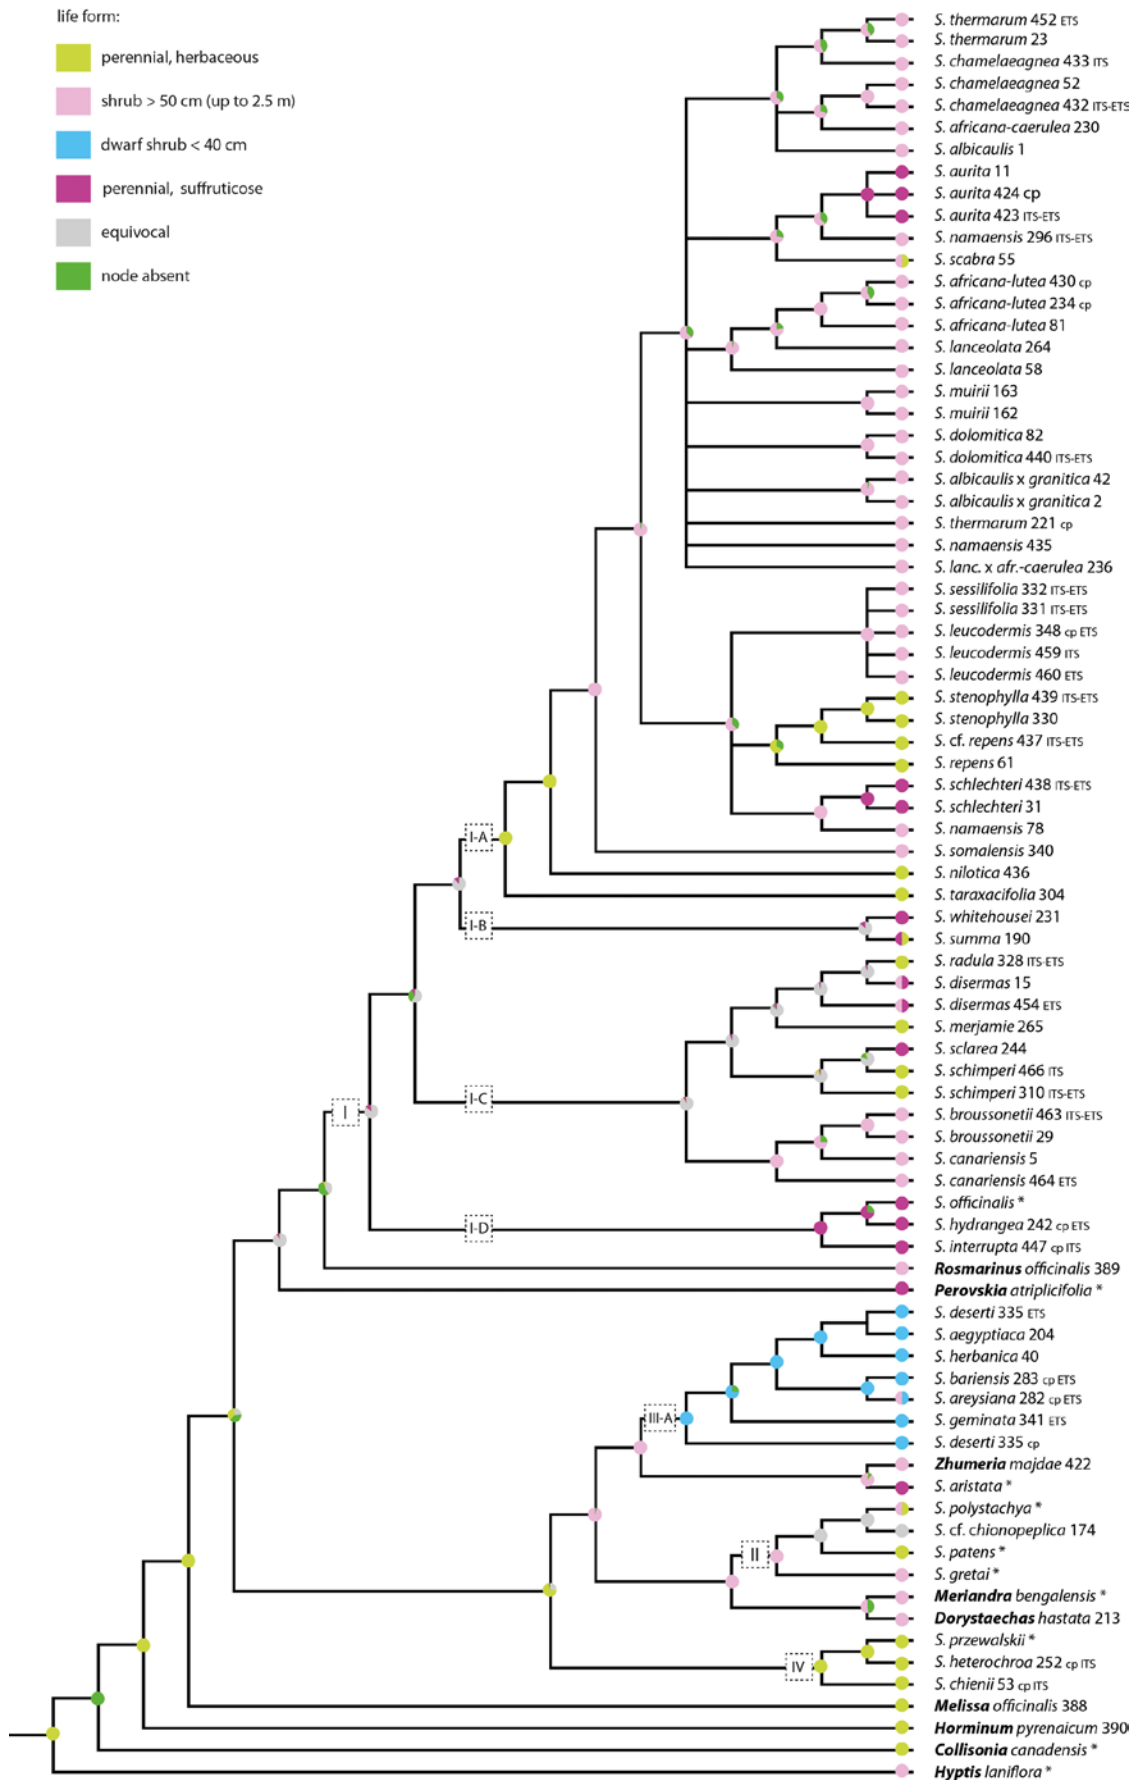

Fig. S4: Ancestral character state reconstruction of the calyx morphology in Sub-Saharan African *Salvia*. Based on the combined dataset; using the 50% majority-rule consensus-tree and 100 randomly sampled trees derived from BI; analysed under the MP criteria using Mesquite.

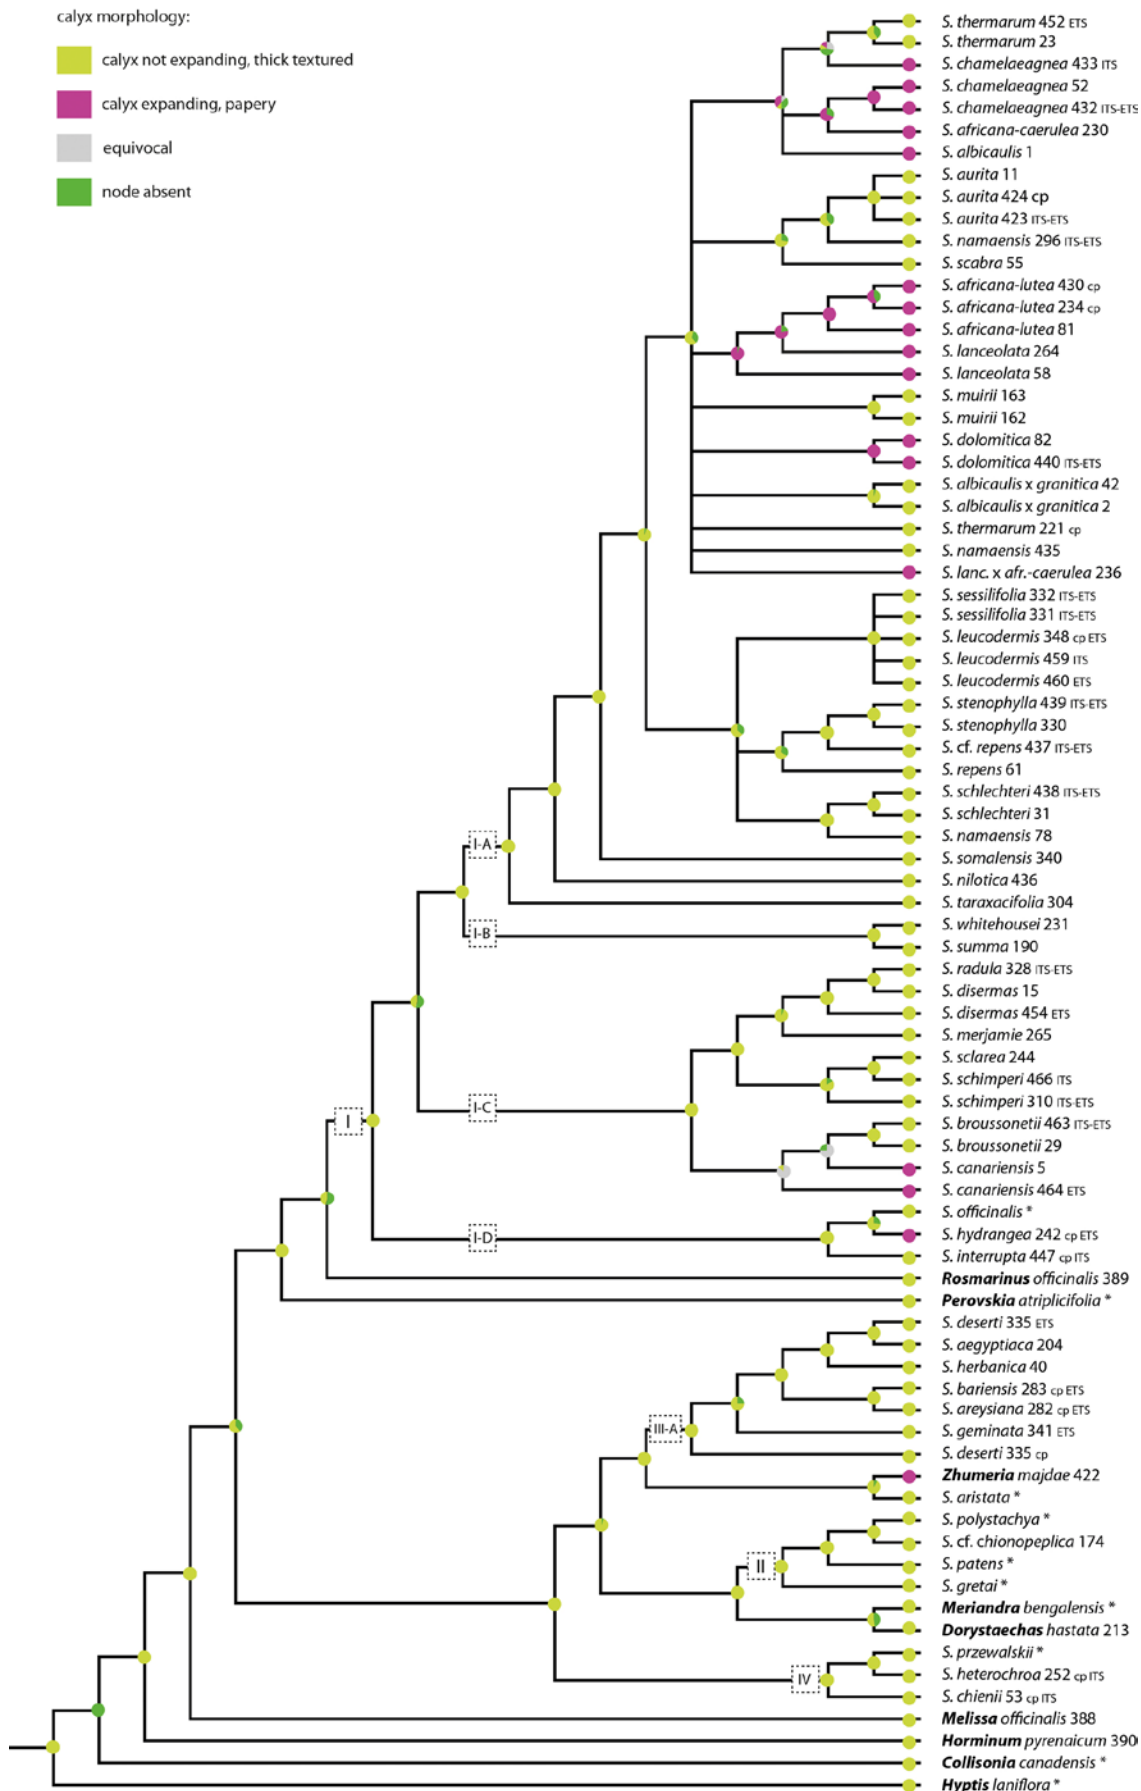

Fig. S5: Ancestral character state reconstruction of the stamen morphology in Sub-Saharan African *Salvia*. Based on the combined dataset; using the 50% majority-rule consensus-tree and 100 randomly sampled trees derived from BI; analysed under the MP criteria using Mesquite. Non-*Salvia* spp. were coded as having ‘other’ stamen morphology since they lack the typical lever mechanism, except *Rosmarinus* (stamen type C).

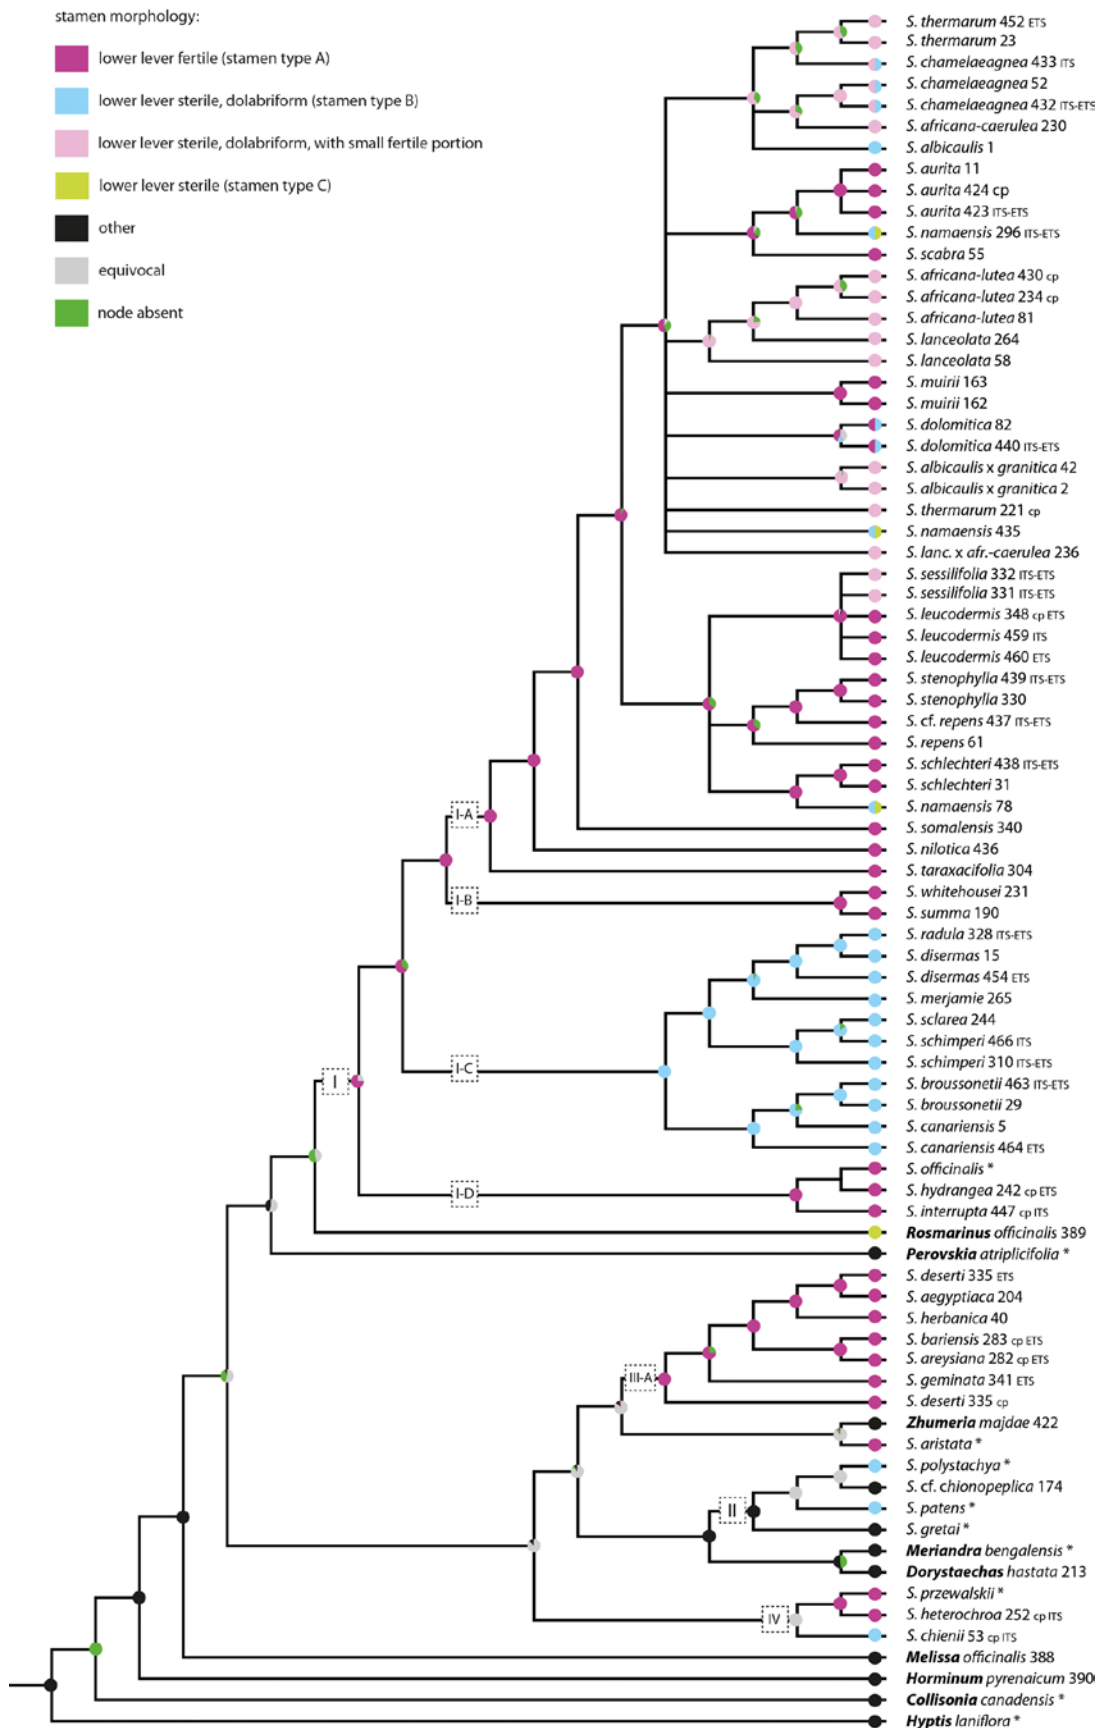

Fig. S6: Ancestral character state reconstruction of the pollination syndrome in Sub-Saharan African *Salvia*. Based on the combined dataset; using the 50% majority-rule consensus-tree and 100 randomly sampled trees derived from BI; analysed under the MP criteria using Mesquite. The character state ‘± mellittophilous’ refers to small flowered species with exposed stamens and also includes two SSA taxa assumed to be pollinated by long-proboscid flies.

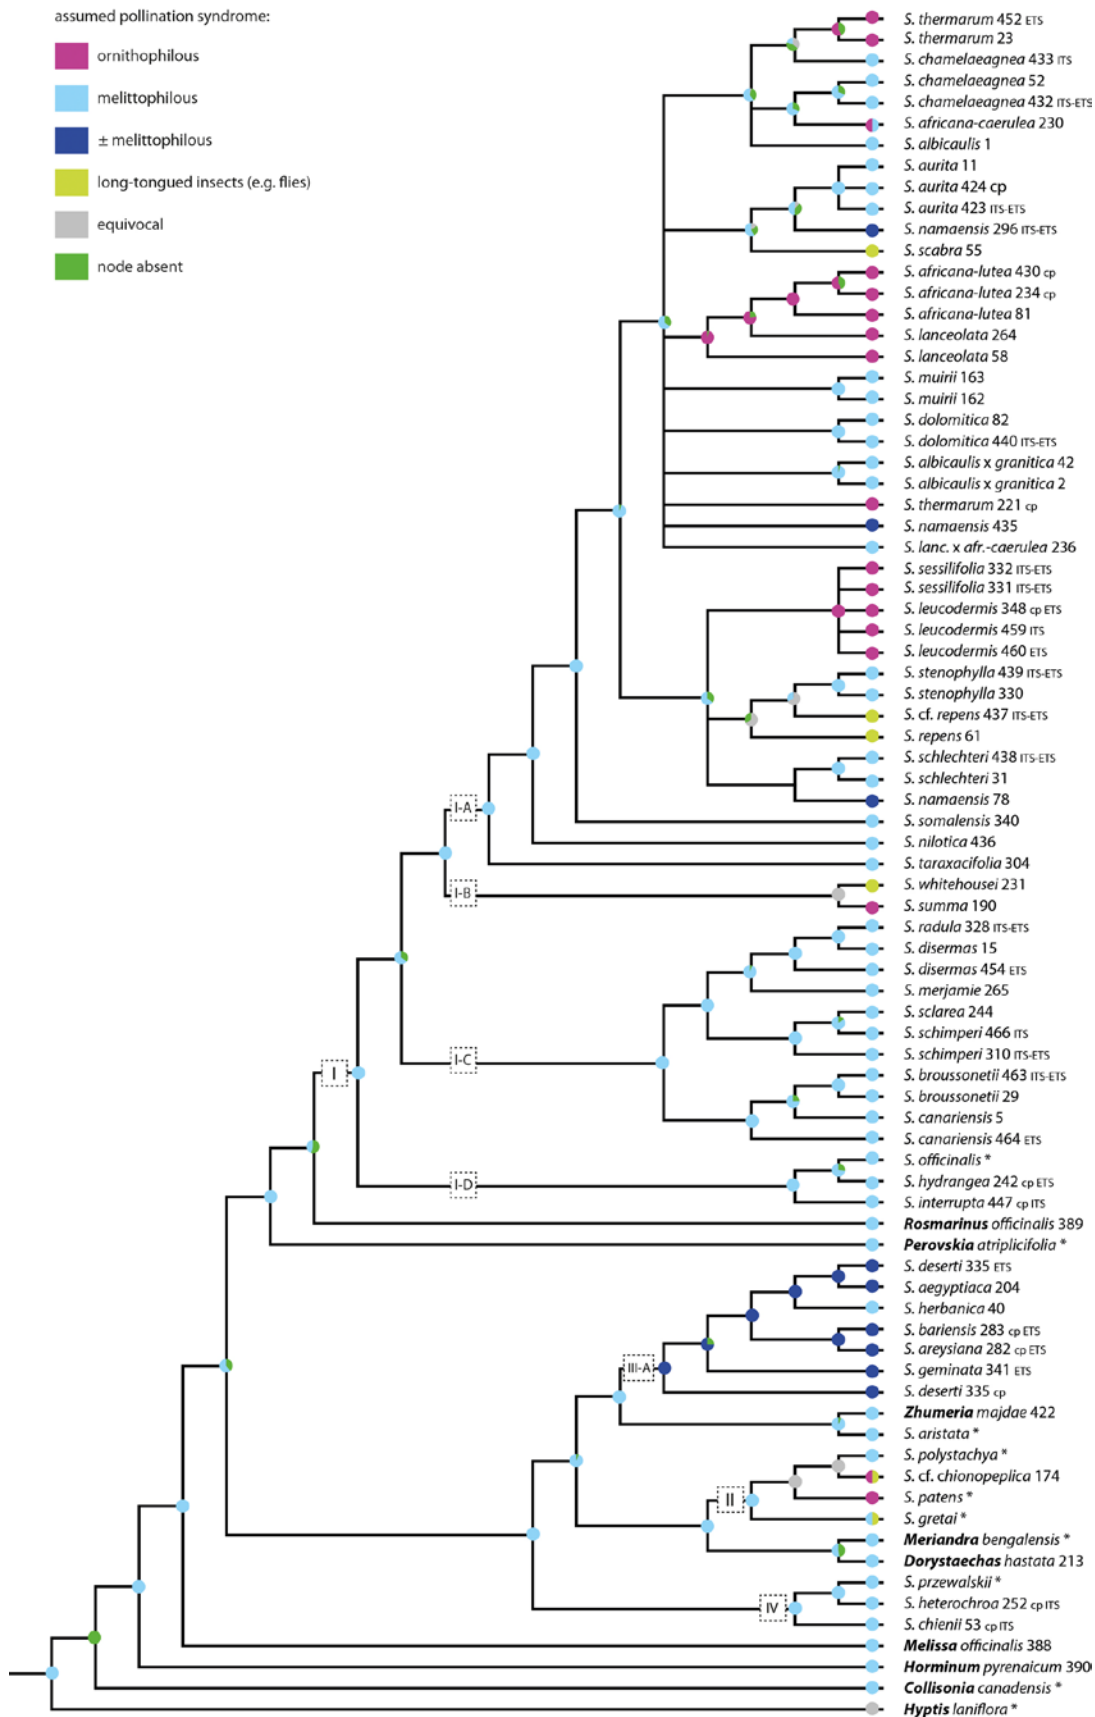

**Table S1: Character states coded for the ancestral character state reconstruction.** Based on observations of living collections (Botanical Garden Mainz), herbarium material and literature research by the first author. Character states (bold numbers) are indicated by ‘?’ when sufficient data is missing; coding as follows: **Character 1 (distribution)**: (1) Canary Islands, (2) Circum Mediterranean Area and North Africa, (3) East Africa and Arabian Peninsula, (4) Southern Africa, (5) Madagascar, (6) America, (7) East Asia, (8) other (implying SW Asia for all taxa but *Horminum pyrenaicum*, which is endemic to S-Europe); **Character 2 (life form)**: (1) shrub > 0.5 m, up to 2.5 m, (2) dwarf shrubs < 0.4 m, (3) suffruticose perennials, (4) herbaceous perennials; **Character 3 (calyx morphology)**: (1) calyx campanulate-infundibuliform with widely diverging lips, expanding from flower to fruit, papery, (2) not or only slightly diverging lips; not or little expanding, thick-textured; **Character 4 (stamen morphology: thecae of the lower lever arm)**: (1) fertile, (2) dolabriform, with small fertile portion, (3) sterile, dolabriform, (4) sterile, acute, (5) other (stamen morphology of non-*Salvia* taxa lacking lever like modifications or NW taxa of sect. *Audibertia* expressing a different stamen morphology); **Character 5 (pollination syndrome)**: (1) ornithophilous, (2) melittophilous, (3) ± melittophilous with rather minute to small, open accessible flowers; a diverse spectrum of potential pollinators is expected, (4) adapted to pollination by long-tongued insects, e.g. long-proboscid flies or Lepidoptera. # = pollination syndrome is assumed based on morphology. \* personal observations are in conflict with data from literature.

| Taxon                                   | Character 1<br><b>distribution</b> |           | Character 2<br><b>life form</b> |           | Character 3<br><b>calyx morphology</b> |           | Character 4<br><b>stamen morphology</b> |           | Character 5<br><b>pollination syndrome</b> |                |
|-----------------------------------------|------------------------------------|-----------|---------------------------------|-----------|----------------------------------------|-----------|-----------------------------------------|-----------|--------------------------------------------|----------------|
|                                         | state                              | reference | state                           | reference | state                                  | reference | state                                   | reference | state                                      | reference      |
| <i>Collinsonia canadensis</i>           | <b>6</b>                           | 15        | <b>4</b>                        | 15        | <b>2</b>                               | 15, 18    | <b>5</b>                                | 15, 18    | <b>2</b>                                   | 15             |
| <i>Dorystaechas hastata</i>             | <b>3 8</b>                         | 6, 17, 18 | <b>1</b>                        | 1, 6      | <b>2</b>                               | 1, 18     | <b>5</b>                                | 6, 18, 39 | <b>2</b>                                   | #              |
| <i>Horminum pyrenaicum</i>              | <b>8</b>                           | 18        | <b>4</b>                        | 1, 18, 31 | <b>2</b>                               | 1, 18     | <b>5</b>                                | 1, 18     | <b>2</b>                                   | 48             |
| <i>Hypätis laniflora</i>                | <b>6</b>                           | 40        | <b>1</b>                        | 30, 40    | <b>2</b>                               | 37        | <b>5</b>                                | 40        | ?                                          | -              |
| <i>Melissa officinalis</i>              | <b>2</b>                           | 24        | <b>4</b>                        | 1, 13     | <b>2</b>                               | 1         | <b>5</b>                                | 1, 18, 55 | <b>2</b>                                   | 49             |
| <i>Meriandra bengalensis</i>            | <b>3</b>                           | 18        | <b>1</b>                        | 32        | <b>2</b>                               | 1         | <b>5</b>                                | 1, 18, 39 | <b>2</b>                                   | #              |
| <i>Perovskia atriplicifolia</i>         | <b>8</b>                           | 24        | <b>3</b>                        | 1, 32     | <b>2</b>                               | 1         | <b>5</b>                                | 1, 18, 39 | <b>2</b>                                   | #              |
| <i>Rosmarinus officinalis</i>           | <b>2</b>                           | 24        | <b>1</b>                        | 1, 13     | <b>2</b>                               | 1         | <b>4</b>                                | 1, 18, 39 | <b>2</b>                                   | 50             |
| <i>Salvia aegyptiaca</i>                | <b>1 2 3 8</b>                     | 2, 12     | <b>2</b>                        | 1, 2      | <b>2</b>                               | 1, 2      | <b>1</b>                                | 1, 2,     | <b>3</b>                                   | #              |
| <i>S. africana-caerulea</i>             | <b>4</b>                           | 2, 10     | <b>1</b>                        | 2, 10     | <b>1</b>                               | 1, 2, 10  | <b>2</b>                                | 1, 2      | <b>1 2</b>                                 | #, 45, 59      |
| <i>S. africana-lutea</i>                | <b>4</b>                           | 2, 10     | <b>1</b>                        | 2, 10     | <b>1</b>                               | 1, 2, 10  | <b>2</b>                                | 2, 41     | <b>1</b>                                   | 41, 45, 46, 47 |
| <i>S. albicaulis</i>                    | <b>4</b>                           | 2, 10     | <b>1</b>                        | 2, 10     | <b>1</b>                               | 2, 10     | <b>3</b>                                | 1, 2      | <b>2</b>                                   | #              |
| <i>S. albicaulis</i> × <i>granitica</i> | <b>4</b>                           | 3         | <b>1</b>                        | 3         | <b>2</b>                               | 1         | <b>2</b>                                | 1         | <b>2</b>                                   | 3              |
| <i>S. areysiana</i>                     | <b>3</b>                           | 4, 5, 8   | <b>1 2</b>                      | 1, 5      | <b>2</b>                               | 1, 8      | <b>1</b>                                | 1, 8      | <b>3</b>                                   | #              |
| <i>S. aristata</i>                      | <b>8</b>                           | 7, 9      | <b>3</b>                        | 7, 9      | <b>2</b>                               | 7         | <b>1</b>                                | 9         | <b>2</b>                                   | #              |
| <i>S. aurita</i>                        | <b>4</b>                           | 2, 10     | <b>3</b>                        | 1, 2, 10  | <b>2</b>                               | 1, 2, 10  | <b>1</b>                                | 2         | <b>2</b>                                   | #              |
| <i>S. bariensis</i>                     | <b>3</b>                           | 11        | <b>2</b>                        | 11        | <b>2</b>                               | 11        | <b>1</b>                                | 11        | <b>3</b>                                   | #              |
| <i>S. broussonetii</i>                  | <b>1</b>                           | 2, 12     | <b>1</b>                        | 1, 2      | <b>2</b>                               | 1, 2      | <b>3</b>                                | 1, 2      | <b>2</b>                                   | #              |
| <i>S. canariensis</i>                   | <b>1</b>                           | 2, 12     | <b>1</b>                        | 1, 2      | <b>1</b>                               | 1, 2      | <b>3</b>                                | 1, 2, 44  | <b>2</b>                                   | #              |
| <i>S. chamelaeagnea</i>                 | <b>4</b>                           | 2, 12     | <b>1</b>                        | 2, 10     | <b>1</b>                               | 2, 10     | <b>2 3</b>                              | 1, 2      | <b>2</b>                                   | #              |

| Taxon                                           | Character 1  |            | Character 2 |              | Character 3      |              | Character 4       |             | Character 5          |            |
|-------------------------------------------------|--------------|------------|-------------|--------------|------------------|--------------|-------------------|-------------|----------------------|------------|
|                                                 | distribution |            | life form   |              | calyx morphology |              | stamen morphology |             | pollination syndrome |            |
|                                                 | state        | reference  | state       | reference    | state            | reference    | state             | reference   | state                | reference  |
| <i>S. chienii</i>                               | 7            | 13         | 4           | 1, 13        | 2                | 1, 13        | 3                 | 1, 13       | 2                    | #          |
| <i>S. cf. chionoeplica</i>                      | 6            | 14         | 1           | 1, 4         | 2                | 1            | 5                 | 1, 60       | 14                   | 51         |
| <i>S. deserti</i>                               | 23           | 2, 16      | 2           | 1, 2         | 2                | 1, 2         | 1                 | 2           | 3                    | #          |
| <i>S. disermas</i>                              | 4            | 2, 10      | 13          | 1, 2, 10     | 2                | 1, 2, 10     | 3                 | 1, 2        | 2                    | #          |
| <i>S. dolomitica</i>                            | 4            | 2, 10      | 1           | 1, 2, 10     | 1                | 1, 2, 10     | 13                | 2           | 2                    | #          |
| <i>S. geminata</i>                              | 3            | 5          | 2           | 1, 5         | 2                | 1, 5         | 1                 | 1, 5        | 3                    | #          |
| <i>S. gretai</i>                                | 6            | 4          | 1           | 4            | 2                | 29           | 5                 | 39, 43      | 24                   | 51         |
| <i>S. herbanica</i>                             | 1            | 12, 19, 20 | 2           | 1, 19        | 2                | 1, 19        | 1                 | 1*, 19      | 2                    | #, 52      |
| <i>S. heterochroa</i>                           | 7            | 13         | 4           | 1, 13        | 2                | 1, 13        | 1                 | 13          | 2                    | #          |
| <i>S. hydrangea</i>                             | 8            | 6, 7       | 3           | 1, 6, 7      | 1                | 1, 6, 7      | 1                 | 6           | 2                    | #          |
| <i>S. interrupta</i>                            | 2            | 2, 21      | 3           | 1, 2         | 2                | 1, 2         | 1                 | 1, 2        | 2                    | #          |
| <i>S. lanceolata</i>                            | 4            | 2, 10      | 1           | 2, 10        | 1                | 1, 2, 10     | 2                 | 1, 2, 41    | 1                    | 41, 45, 47 |
| <i>S. lanceolata</i> × <i>africana-caerulea</i> | 4            | 3          | 1           | 1            | 1                | 1, 58        | 2                 | 1           | 2                    | #          |
| <i>S. leucodermis</i>                           | 5            | 2, 22, 23  | 1           | 1, 2, 22, 23 | 2                | 1, 2, 22, 23 | 1                 | 2           | 1                    | #          |
| <i>S. merjamie</i>                              | 3            | 2, 25, 26  | 4           | 1, 2         | 2                | 1, 2         | 3                 | 1, 2        | 2                    | #          |
| <i>S. muirii</i>                                | 4            | 2, 10      | 1           | 2, 10        | 2                | 1, 2, 10     | 1                 | 2           | 2                    | #          |
| <i>S. namaensis</i>                             | 4            | 2, 10      | 1           | 1, 2, 10     | 2                | 1, 2, 10     | 34                | 1, 2        | 3                    | #          |
| <i>S. nilotica</i>                              | 34           | 2, 25, 26  | 4           | 1, 2         | 2                | 1, 2         | 1                 | 1, 2        | 2                    | #          |
| <i>S. officinalis</i>                           | 28           | 4          | 3           | 1, 31        | 2                | 1, 31        | 1                 | 1, 13, 42   | 2                    | 1, 48      |
| <i>S. patens</i>                                | 6            | 4          | 4           | 1, 27, 33    | 2                | 1            | 3                 | 1, 39, 42   | 1                    | 51         |
| <i>S. polystachya</i>                           | 6            | 4, 27      | 14          | 4, 27, 56    | 2                | 56           | 3                 | 39          | 2                    | 51         |
| <i>S. przewalskii</i>                           | 7            | 13         | 4           | 13           | 2                | 1, 13        | 1                 | 1, 44       | 2                    | #          |
| <i>S. radula</i>                                | 4            | 2, 10      | 4           | 2, 10        | 2                | 1, 2, 10     | 3                 | 1, 2        | 2                    | #          |
| <i>S. repens</i>                                | 4            | 2, 10      | 4           | 2, 10        | 2                | 1, 2, 10     | 1                 | 2           | 4                    | #, 53, 54  |
| <i>S. scabra</i>                                | 4            | 2, 10      | 14          | 1, 2, 10     | 2                | 1, 2, 10     | 1                 | 1, 2, 44    | 4                    | #, 53, 54  |
| <i>S. schimperi</i>                             | 3            | 2          | 4           | 2            | 2                | 2, 10        | 3                 | 2           | 2                    | #          |
| <i>S. schlechteri</i>                           | 4            | 2, 10      | 3           | 1, 2, 10     | 2                | 1, 2, 10     | 1                 | 1, 2        | 2                    | #          |
| <i>S. sclarea</i>                               | 28           | 2, 6, 7    | 3           | 1, 2, 6, 7   | 2                | 1, 2, 6, 7   | 3                 | 1, 2, 6, 39 | 2                    | 1, #       |
| <i>S. sessilifolia</i>                          | 5            | 2, 22, 23  | 1           | 1, 2, 22, 23 | 2                | 1, 2, 22, 23 | 2                 | 2           | 1                    | 47         |
| <i>S. somalensis</i>                            | 3            | 2          | 1           | 1, 2         | 2                | 1, 2, 10     | 1                 | 1, 2        | 2                    | #          |
| <i>S. stenophylla</i>                           | 4            | 2, 10      | 4           | 1, 2, 10     | 2                | 1, 2, 10     | 1                 | 2, 44       | 2                    | #          |
| <i>S. summa</i>                                 | 6            | 4          | 34          | 34           | 2                | 1, 38        | 1                 | 38          | 1                    | 47, 51     |
| <i>S. taraxacifolia</i>                         | 2            | 2, 21      | 4           | 1, 2         | 2                | 1, 2         | 1                 | 1, 2, 39    | 2                    | #          |
| <i>S. thermarum</i>                             | 4            | 28         | 1           | 1, 28        | 2                | 1, 28        | 2                 | 1, 41       | 1                    | 41         |
| <i>S. whitehousei</i>                           | 6            | 4          | 3           | 35           | 2                | 35, 36       | 1                 | 35, 36      | 4                    | 51         |
| <i>Zhumeria majdae</i>                          | 8            | 17, 18     | 1           | 18           | 1                | 18           | 5                 | 18, 39      | 2                    | 57         |



**References:** 1 M. Will (pers. obs.); 2 Hedge (1974); 3 E. Van Jaarsveld (pers. com.); 4 Alziar (1988-1993); 5 Thulin (2009); 6 Hedge (1982a); 7 Hedge (1982b); 8 Hedge (1982c); 9 Behçet and Avlamaz (2009); 10 Codd (1985); 11 Thulin (1993); 12 Hansen and Sunding (1993); 13 Li and Hedge (1994); 14 P. Wester (Univ. of Düsseldorf, Germany, pers. com.); 15 Peirson et al. (2006); 16 Boulos (2008); 17 Hedge (1986); 18 Harley et al. (2004); 19 Santos and Fernández (1986); 20 Scholz (1993); 21 Fennane and Ibn Tattou (1998); 22 Hedge (1972a); 23 Hedge (1998); 24 Mabberley (2008); 25 Hedberg (1957); 26 Blundell (1982); 27 Epling (1939); 28 Van Jaarsfeld (1999); 29 McMinn (1964); 30 Harley and Pastore (2012); 31 Hedge (1972b); 32 Hedge (1990); 33 Turner (2011); 34 Nelson (1931); 35 Cory (1930); 36 Whitehouse (1949); 37 Schumacher (1827); 38 Walker and Elisens (2001); 39 Walker and Sytsma (2007); 40 Shreve and Wiggins (1964); 41 Wester and Claßen-Bockhoff (2006); 42 Werth (1956); 43 Neisess (1983); 44 Claßen-Bockhoff et al. (2004); 45 Wester (2013); 46 Geerts and Pauw (2009); 47 Wester and Claßen-Bockhoff (2007); 48 Ricciardelli d'Albore and Intoppa (2000); 49 Chwil (2009); 50 Herrera (2005 and literature cited therein); 51 Wester and Claßen-Bockhoff (2011); 52 S. Scholz (pers. comm.); 53 Potgieter and Edwards (2001); 54 Potgieter and Edwards (2005); 55 Galeş et al. (2010); 56 Ramamoorthy (2001); 57 Jamzad et al. (2006); 58 Van Jaarsveld (2002); 59 Marloth (1908); 60 Epling (1940). A comprehensive list with references is lacking here.

Will and Claßen-Bockhoff  
Why Africa matters: evolution of Old World *Salvia* (Lamiaceae) in Africa

## MCU081

### References Supplementary Data (Table S1):

- Alziar G. 1988-1993. Catalogue synonymique des *Salvia* L. du monde (Lamiaceae). I à VI. *Biocosme Méditerranéen, Nice* 5: 87-136; 6: 79-115; 6: 163-204; 7: 59-109; 9: 413-497; 10: 33-117.
- Behçet L, Avlamaz D. 2009. A New Record for Turkey: *Salvia aristata* Aucher ex Benth. (Lamiaceae). *Turkish Journal of Botany* 33: 61-63.
- Blundell M. 1982. *The wild flowers of Kenya*, London, Collins.
- Boulos L. 2008. Flora and vegetation of the deserts of Egypt. *Flora Mediterranea* 18: 341-359.
- Chwil M. 2009. Flowering biology and nectary structure of *Melissa officinalis* L. *Acta Agrobotanica* 62: 23-30.
- Claßen-Bockhoff R, Crone M, Baikova E. 2004. Stamen development in *Salvia* L.: homology reinvestigated. *International Journal of Plant Sciences* 165: 475-498.
- Codd LE. 1985. *Salvia* In: Leistner OA ed. *Flora of Southern Africa. Lamiaceae*. Pretoria: Botanical Research Institute, Department of Agriculture and Water Supply, 79-101.
- Cory VL. 1930. A new *Salviastrum* from the Edwards Plateau of Texas. *Rhodora* 32: 89-90.
- Epling C. 1939. *A revision of Salvia, subgenus Calospatha*, Berlin, Repertorium Specierum Novarum Regni Vegetabilis. *Centralblatt für Sammlung und Veröffentlichung von Einzeldiagnosen neuer Pflanzen. Beihefte* 110: 1-383.
- Epling C. 1940. Supplementary notes on *Salvia: Audubertia*. *Annals of the Missouri Botanical Garden* 27: 259-262.
- Fennane M, Ibn Tattou M. 1998. Pteridophyta. In: Raimondo, FM, Valdés B, eds. *Catalogue des plantes vasculaires rares, menacées ou endémiques du Maroc*, Benito: Herbarium Mediterraneum Panormitanum, 243.
- Galeş R, Preotu A, Toma C. 2010. Aspects of floral structure and morphogenesis in *Melissa officinalis* L. *Analele științifice ale Universității "Al. I. Cuza" Iași Tomul LVI, fasc. 1, s. II a. Biologie vegetală* 56: 15-19.
- Geerts S, Pauw A. 2009. Hyper-specialization for long-billed bird pollination in a guild of South African plants: the Malachite Sunbird pollination syndrome. *South African Journal of Botany* 75: 699-706.
- Hansen A, Sunding P. 1993. Flora of Macaronesia. Checklist of Vascular plants. 4. revised edn. *Sommerfeltia*. Oslo: Botanical Garden and Museum, University of Oslo: 140-141.
- Harley RM, Pastore JFB. 2012. A generic revision and new combinations in the Hyptidinae (Lamiaceae), based on molecular and morphological evidence. *Phytotaxa* 58: 1-55.
- Harley RM, Atkins S, Budantsev AL, Cantino PD, Conn BJ, Grayer R, Harley MM, Kok R, Krestovskaja T, Morales R, Paton AJ, Ryding O, Upson T. 2004. Labiatae. In: Kadereit JW ed. *The Families and Genera of Vascular Plants 7, Lamiales*. Berlin: Springer, 167-282.
- Hedberg O. 1957. *Afroalpine vascular plants. A taxonomic revision*, Uppsala, A.-B. Lundequistska Bokhandeln.
- Hedge IC. 1972a. *Salvia* in Madagascar. *Notes from the Royal Botanical Garden, Edinburgh* 32: 1-11.
- Hedge IC. 1972b. *Salvia*. In: Tutin TG, Heywood VH, Burges NA, Moore DM, Valentine DH, Walters SM, Webb DA eds. *Flora Europaea*. Cambridge: Cambridge University Press, 188-192.

- Hedge IC. 1974. A revision of *Salvia* in Africa including Madagascar and the Canary Islands. Notes from the Royal Botanical Garden, Edinburgh 33: 1–121.
- Hedge IC. 1982a. *Salvia*. In: Davis PH ed. *Flora of Turkey*. Edinburgh: Edinburgh University Press, 400-461.
- Hedge IC. 1982b. *Salvia*. In: Rechinger KH ed. *Flora Iranica*. Graz: Akademische Druck- und Verlagsanstalt, 403-476.
- Hedge IC. 1982c. Studies in the flora of Arabia: II Some new and interesting species of Labiatae. *Notes from the Royal Botanical Garden, Edinburgh* 40: 63-73.
- Hedge IC. 1986. Labiatae of South-West Asia: diversity, distribution and endemism. *Proceedings of the Royal Society of Edinburgh. Section B* 89: 23-35.
- Hedge IC. 1990. 192. Labiatae. In: Ali SI, Nasir YJ, eds. *Flora of Pakistan*. Pakistan, Karachi: University of Karachi, 360-362.
- Hedge IC. 1998. *Salvia*. In: Hedge IC, Clement RA, Paton AJ, Phillipson PB, eds. *Flore de Madagascar et de Comores, Famille 175 Labiatae*. Paris: Muséum National d'Histoire Naturelle, Labor. de Phanérogamie, 52-64.
- Herrera J. 2005. Flower size variation in *Rosmarinus officinalis*: individuals, populations and habitats. *Annals of Botany* 95: 431-437.
- Jamzad Z, Abbas Azimi R, Dehghan M. 2006. Pollen morphology and staminal structure in *Salvia* and *Zhumeria* (Lamiaceae). *Rostaniha* 7: 283-298.
- Li X, Hedge IC. 1994. Lamiaceae. In: Wu ZY, Raven PH, eds. *Flora of China* 17. St. Louis, United States: Science Press, Beijing, China and Missouri Botanical Garden, 196-223.
- Mabberley D. 2008. *Mabberley's plant book: a portable dictionary of plants, their classification and uses*. New York, Cambridge University Press.
- McMinn HE. 1964. *An Illustrated Manual of California Shrubs*. Berkeley: University of California Press.
- Marloth R. 1908. Some observations on entomophilous flowers. *South African Journal of Science* 4: 110-113.
- Neissess KR. 1983. *Evolution, systematics, and terpene relationships of Salvia section Audibertia*. Ph.D. Thesis, University of California, Riverside.
- Nelson A. 1931. Rocky Mountain Herbarium Studies I. *American Journal of Botany* 18: 431-442.
- Peirson JA, Cantino PD, Ballard HEJ. 2006. A taxonomic revision of *Collinsonia* (Lamiaceae) based on phenetic analyses of morphological variation. *Systematic Botany* 31: 398-409.
- Potgieter CJ, Edwards TJ. 2001. The occurrence of long, narrow corolla tubes in Southern African Lamiaceae. *Systematics and Geography of Plants* 71: 493-502.
- Potgieter CJ, Edwards TJ. 2005. The *Stenobasipteron wiedemanni* (Diptera, Nemestrinidae) pollination guild in Eastern Southern Africa. *Annals of the Missouri Botanical Garden* 92: 254-267.
- Ramamoorthy TP. 2001. *Salvia*. In: De Rzedowski GC, Rzedowski J, eds. *Flora Fanerogámica del Valle de Mexico*. Pátzcuaro, Michacán: Instituto de Ecología, A.C., Xalapa, 632-644.
- Ricciardelli d'Albore G, Intoppa F. 2000. European bee forage. In: *Fiori e api. La flora visitata dalle api e dagli altri apoidei in Europa*. Calderini: Edagricole, 115.
- Santos A, Fernández M. 1986. *Salvia herbanica* spec. nova (Labiatae) en la flora de Fuerteventura (I. Canarias). *Lazaroa* 9: 51-54.
- Scholz S. 1993. Nuevos datos acerca de *Salvia herbanica* Santos et Fernández (Lamiaceae). *Vieraea* 22: 29-34.
- Schumacher CF. 1827. Beskrivelse af Guineiske planter som ere fundne af Danske botanikere, især af etatsraad Thonning. Pp. 261.

- Shreve F, Wiggins IL. 1964. Labiatae. In: Shreve F, Wiggins IL, eds. *Vegetation and Flora of the Sonoran Desert*. Stanford: Stanford University Press, 401-412.
- Thulin M. 1993. *Salvia* (Labiatae) in the mountains of Northern Somalia. *Opera Botanica* 121: 145-148.
- Thulin M. 2009. *Salvia geminata* sp. nov. with remarkable stamen arrangement from southern Yemen, with notes on *S. areysiana* (Lamiaceae). *Nordic Journal of Botany* 27: 336-338.
- Turner BL. 2011. Recension of Mexican species of *Salvia* sect. *Stanleyana* (Lamiaceae). *Phytoneuron* 23: 1-6.
- Van Jaarsveld EJ. 1999. *Salvia thermara*, a new species from the Western Cape, South Africa. *Bothalia* 29: 100-102.
- Van Jaarsveld EJ. 2002. South African sages. *Veld and Flora* 88: 102-104.
- Walker JB, Elisens WJ. 2001. A revision of *Salvia* section *Heterosphace* (Lamiaceae) in western North America. *Sida, Contributions to Botany* 19: 571-589.
- Walker JB, Sytsma KJ. 2007. Staminal evolution in the genus *Salvia* (Lamiaceae): molecular phylogenetic evidence for multiple origins of the staminal lever. *Annals of Botany* 100: 375-391.
- Werth E. 1956. Zur Kenntnis des Androeceums der Gattung *Salvia* und seiner stammesgeschichtlichen Wandlung. *Berichte der deutschen botanischen Gesellschaft, Berlin* 69: 381-386.
- Wester P. 2013. Sunbirds hover at flowers of *Salvia* and *Lycium*. *Ostrich* 84: 27-32.
- Wester P, Claßen-Bockhoff R. 2006. Bird pollination in South African *Salvia* species. *Flora - Morphology, Distribution, Functional Ecology of Plants* 201: 396-406.
- Wester P, Claßen-Bockhoff R. 2007. Floral diversity and pollen transfer mechanisms in bird-pollinated *Salvia* species. *Annals of Botany* 100: 401-421.
- Wester P, Claßen-Bockhoff R. 2011. Pollination syndromes of New World *Salvia* species with special reference to bird pollination. *Annals of the Missouri Botanical Garden* 98: 101-155.
- Whitehouse E. 1949. Revision of *Salvia* section *Salviastrum* Gray. *Field and Laboratory* 17: 151-165.
